# Supplementary material
Source: PubMed Central journal article supplement (PMC6295712)
Supplement: supp_RA118.004463_138764_1_supp_215516_pgsm7b.pdf [file supp_RA118.004463_138764_1_supp_215516_pgsm7b.pdf]

## SUPPORTING INFORMATION

### **A two-phase model for the non-processive biosynthesis of homogalacturonan polysaccharides by the GAUT1:GAUT7 complex**

Robert A. Amos, Sivakumar Pattathil, Jeong-Yeh Yang, Melani A. Atmodjo, Breeanna R. Urbanowicz, Kelley W. Moremen, Debra Mohnen

**Figure S1. Effect of divalent and monovalent metal ions on the acceptor-dependent HG:GalAT activity of the GAUT1:GAUT7 complex .**

**Figure S2. GAUT1:GAUT7 elongates DP11 acceptors in a manner dependent on the available donor:acceptor ratio.**

**Figure S3. Elongation of DP3 and DP7 acceptors detected by MALDI-TOF MS.**

**Figure S4. Elongation of DP7 acceptors results in a bimodal product distribution under a donor:acceptor ratio ranging from 10 to 200.**

**Figure S5. Digestion by endopolygalacturonase (EPG) of HG synthesized by acceptor-dependent elongation and *de novo* synthesis.**

**Figure S6 – Boiled enzyme controls, T0 starting acceptors for Fig.6A.**

**Figure S7. SEC separation with fluorescence detection of DP7-2AB acceptor and high molecular weight products.**

**Table S1. Results of Michaelis-Menten Kinetics assay experiments of the Arabidopsis heterologously-expressed GAUT1:GAUT7 complex.**

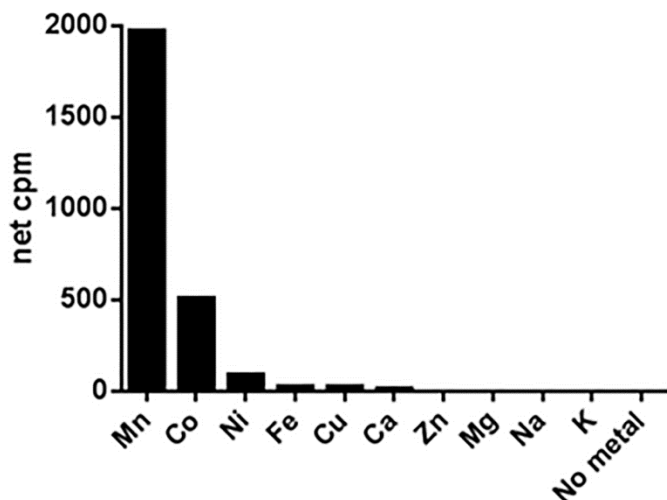

**Figure S1. Effect of divalent and monovalent metal ions on the acceptor-dependent HG:GalAT activity of the GAUT1:GAUT7 complex .** Metal-depleted GAUT1:GAUT7 was generated by overnight dialysis against HEPES, pH 7.2 buffer containing Chelex-100. After addition of the indicated metals at 0.25 mM in the reaction buffer, GAUT1:GAUT7 was assayed for activity in 5 min reactions containing 100 nM GAUT1:GAUT7, 5  $\mu$ M UDP- $^{14}$ C]GalA, 1 mM total UDP-GalA, HEPES buffer pH 7.2, and 0.05% BSA. The activity of all metals other than  $Mn^{2+}$  and  $Co^{2+}$  yielded less than 5% of the  $Mn^{2+}$  activity. Data represent a single experiment. Replicate experiments for  $Mn^{2+}$  and  $Co^{2+}$  are displayed in Fig. 2C.

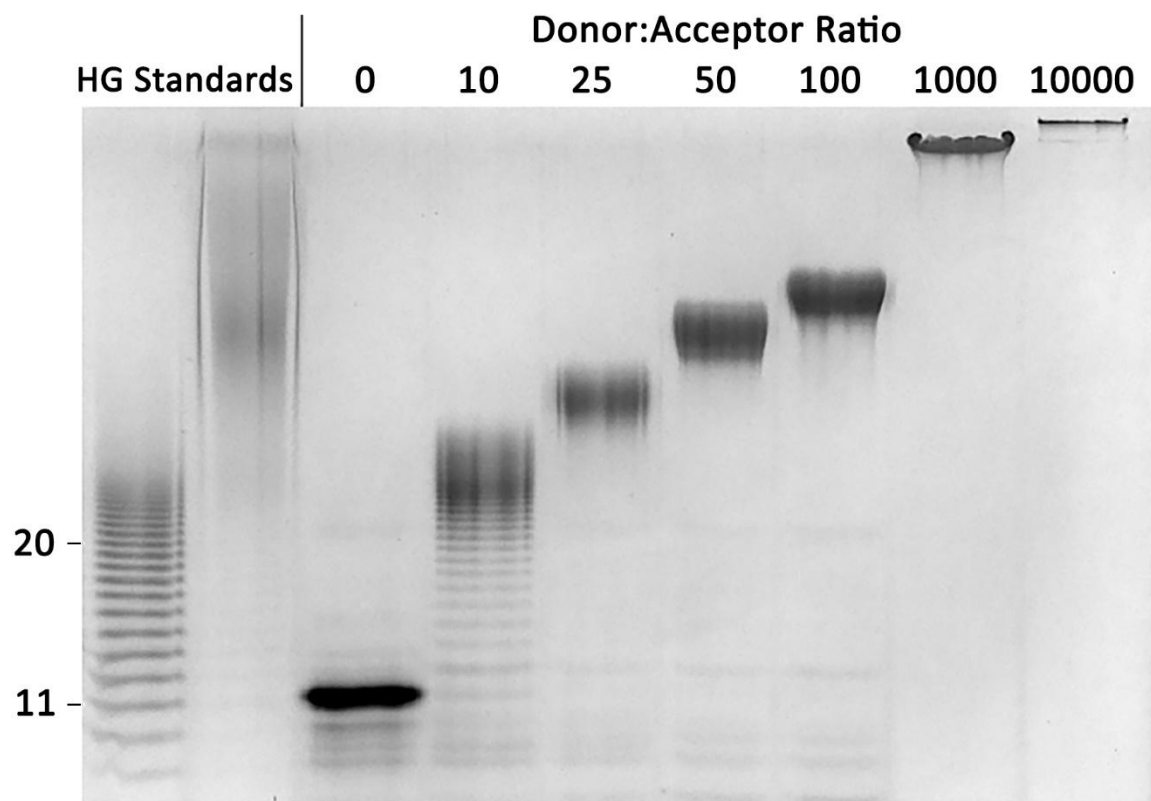

**Figure S2. GAUT1:GAUT7 elongates DP11 acceptors in a manner dependent on the available donor:acceptor ratio.** Following incubation of GAUT1:GAUT7 with the indicated ratios of UDP-GalA donor to DP11 acceptor for 12 h, samples were loaded into high-percentage PAGE gels stained with alcian blue/silver. Larger products were detected with increasing donor:acceptor ratio. For ratios of 0-100, 25  $\mu$ M acceptor was incubated with varying amounts of UDP-GalA. For ratios of 1000 and 10000, 1 mM UDP-GalA was incubated with 1  $\mu$ M and 0.1  $\mu$ M acceptor, respectively. HG oligosaccharide standards (lane 1) and PGA (lane 2) are described in Fig. 3B.

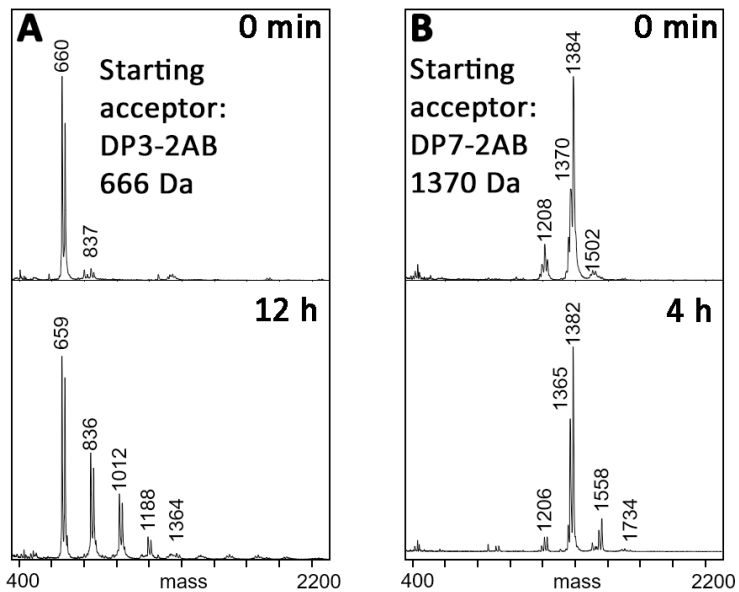

**Figure S3. Elongation of DP3 and DP7 acceptors detected by MALDI-TOF MS.** After incubation of GAUT1:GAUT7 with 1 mM UDP-GalA and **A**, DP3 acceptor (1 mM) for 12 h or **B**, DP7 acceptor (100  $\mu$ M) for 4 h, addition of only 1-4 GalA units can be detected by MALDI-TOF MS analysis of 2-AB-labeled HG elongation products. Using either acceptor, longer-chain HG products were not detected after longer reaction incubation times (up to 48 h, data not shown). The series of ions (m/z) with a mass separation of 176 Da is consistent with sequential addition of GalA.

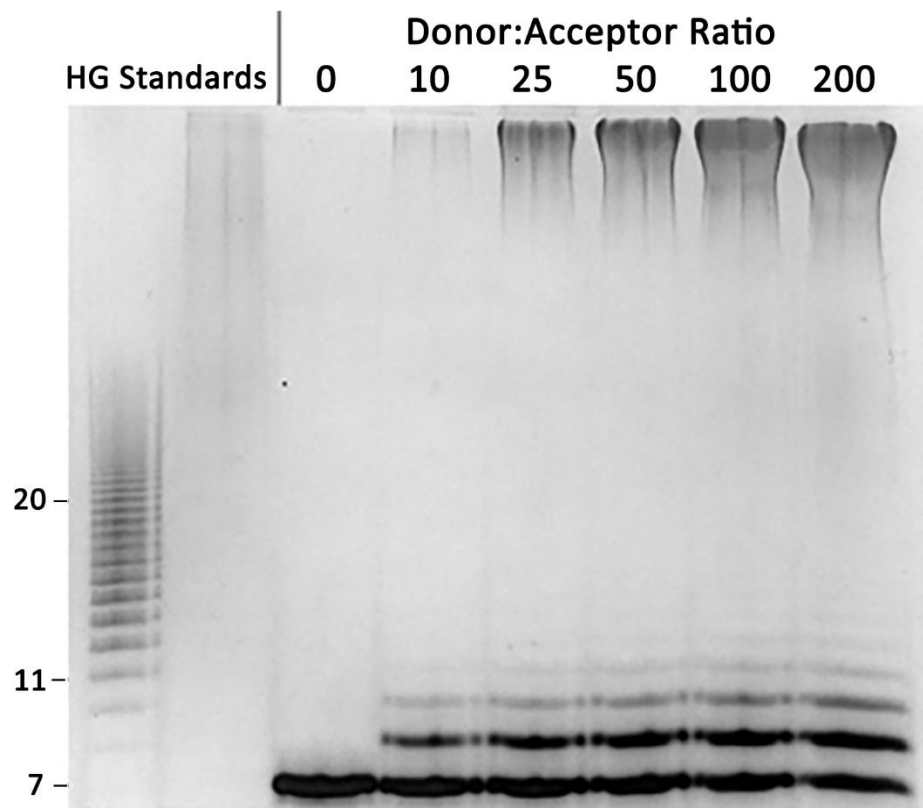

**Figure S4. Elongation of DP7 acceptors results in a bimodal product distribution under a donor:acceptor ratio ranging from 10 to 200.** Following incubation of GAUT1:GAUT7 with the indicated ratios of UDP-GalA donor to DP11 acceptor for 12 h, samples were loaded into high-percentage PAGE gels stained with alcian blue/silver. High MW products were detected under all donor:acceptor ratios tested. For all reactions, 25  $\mu$ M DP7 acceptor was incubating with increasing amounts of UDP-GalA. HG oligosaccharide standards (lane 1) and PGA (lane 2) are described in Fig. 3B.

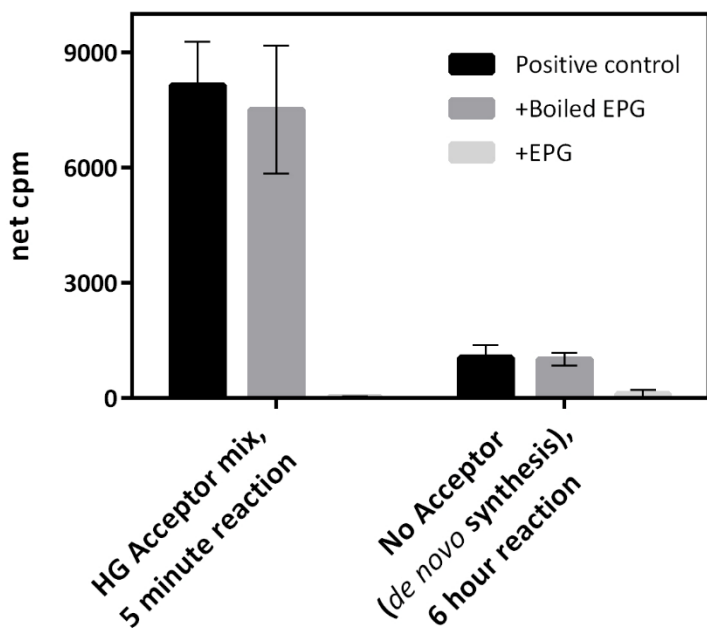

**Figure S5. Digestion by endopolygalacturonase (EPG) of HG synthesized by acceptor-dependent elongation and *de novo* synthesis.** Acceptor-dependent activity was measured in 5 minute reactions containing 100 nM GAUT1:GAUT7, 5  $\mu$ M UDP- $^{14}$ C]GalA and 10  $\mu$ M HG mix. *De novo* synthesis activity was measured in 6-hour reactions containing 500 nM GAUT1:GAUT7 and 5  $\mu$ M UDP- $^{14}$ C]GalA. Following addition of sodium acetate buffer, pH 4.2, samples were incubated for 18 h with H<sub>2</sub>O (positive control), 20 mU of endopolygalacturonase, or EPG deactivated by boiling. Error bars represent the standard deviation from three independent experiments.

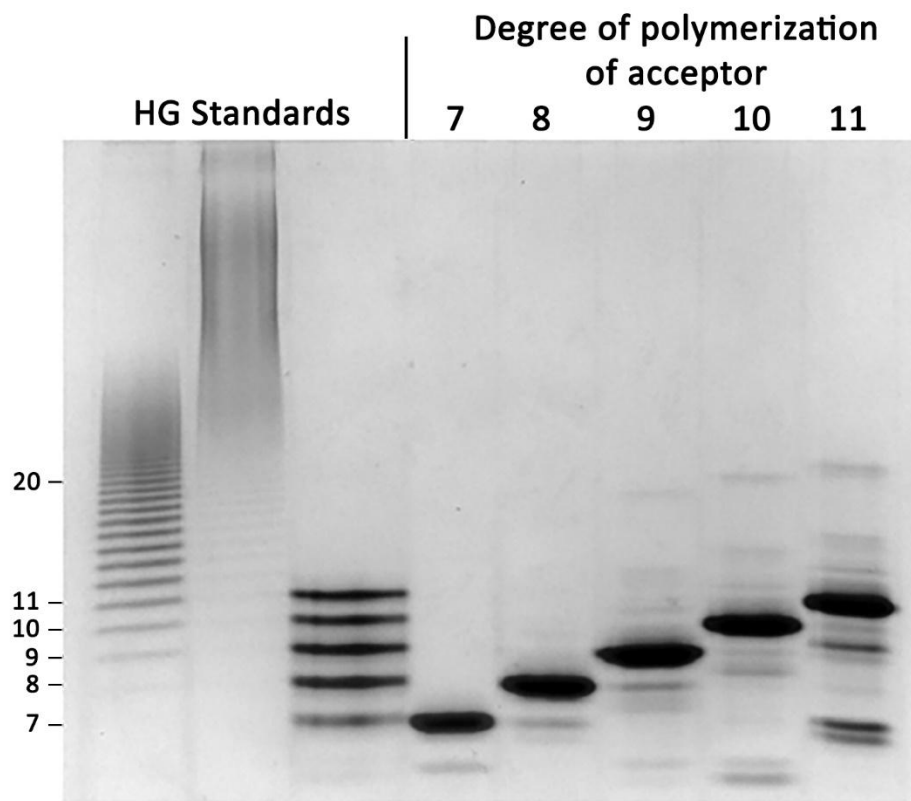

**Figure S6 – Boiled enzyme controls, T0 starting acceptors for Fig.6A.** As in Fig. 6A, reactions containing 100 nM GAUT1:GAUT7, 1 mM UDP-GalA, and 100  $\mu$ M acceptor of DP 7-11 were incubated for 12 h. Enzyme was inactivated by pre-boiling prior to the reaction. HG oligosaccharide standards (lane 1) and PGA (lane 2) are described in Fig. 3B. Lane 3 is a mixture of HG DP 7-11 standards, 50 ng each.

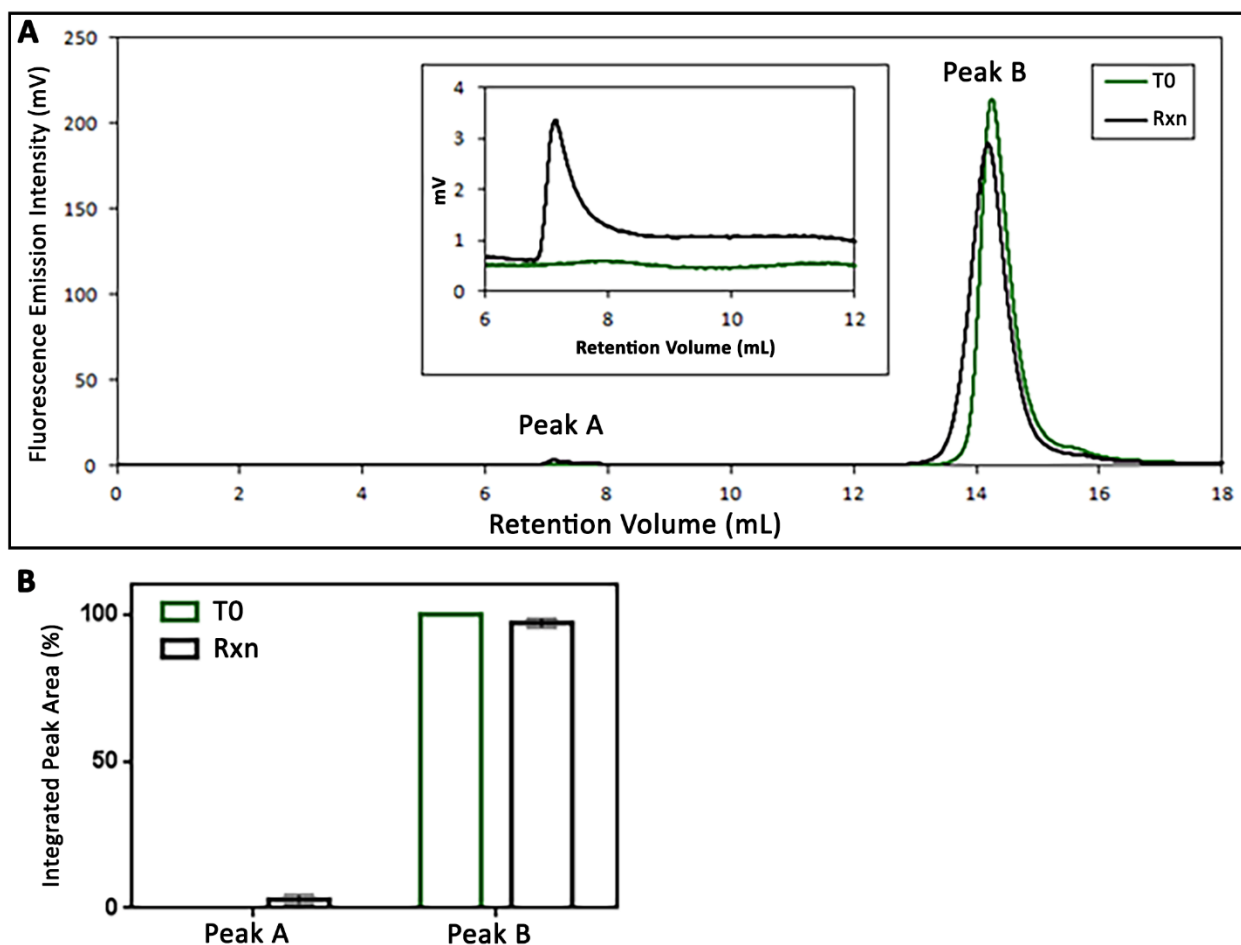

**Figure S7. SEC separation with fluorescence detection of DP7-2AB acceptor and high molecular weight products.** **A**, Following a 24 h incubation of GAUT1:GAUT7 with 100  $\mu$ M DP7-2AB, high molecular weight polysaccharides (Peak A) were measured by size exclusion chromatography with fluorescence detection. The non-symmetrical Peak B contains the unreacted DP7-2AB acceptor and DP8-9 elongation products, as demonstrated in Fig. 5B and Fig. S2. The inset is a magnification of Peak A. GAUT1:GAUT7 was pre-boiled in T0 control samples, representing the unreacted DP7-2AB acceptor (dark green). **B**, Quantitation was performed by integration of peak area using Chromeleon software. Total area in Peak A and Peak B was normalized to 100%. From three replicate experiments, the percentage of integrated peak area in Peak A, representing the proportion of the starting acceptor that was elongated to high MW products, was 2.9%.



| <b>Variable substrate</b> | <b>Donor [UDP-GalA]</b> | <b>Acceptor [HG]</b> | $k_{\text{cat}}$    | $K_M$             | $k_{\text{cat}} / K_M$               | $K_i$             |
|---------------------------|-------------------------|----------------------|---------------------|-------------------|--------------------------------------|-------------------|
|                           | ( $\mu\text{M}$ )       | ( $\mu\text{M}$ )    | ( $\text{s}^{-1}$ ) | ( $\mu\text{M}$ ) | ( $\mu\text{M}^{-1} \text{s}^{-1}$ ) | ( $\mu\text{M}$ ) |
| UDP-GalA                  | 5-1000                  | 10                   | $1.48 \pm 0.10$     | $219 \pm 37.4$    | <b>0.0068</b>                        | -                 |
| UDP-GalA                  | 5-1000                  | 10                   | $1.36 \pm 0.06$     | $231 \pm 24.5$    | <b>0.0058</b>                        | -                 |
| UDP-GalA                  | 5-2000                  | 100                  | $0.92 \pm 0.02$     | $151 \pm 10.6$    | <b>0.0061</b>                        | -                 |
| UDP-GalA                  | 5-2000                  | 100                  | $0.95 \pm 0.03$     | $136 \pm 16.7$    | <b>0.0070</b>                        | -                 |
| HG DP7-23                 | 1000                    | 0.01-50              | $1.99 \pm 0.06$     | $0.8 \pm 0.01$    | <b>2.5</b>                           | $40.9 \pm 3.6$    |
| HG DP7-23                 | 1000                    | 0.01-50              | $1.63 \pm 0.19$     | $1.0 \pm 0.30$    | <b>1.6</b>                           | $32.7 \pm 10.6$   |
| HG DP11                   | 1000                    | 0.01-100             | $3.92 \pm 0.30$     | $1.4 \pm 0.2$     | <b>2.8</b>                           | $14.6 \pm 2.1$    |
| HG DP11                   | 1000                    | 0.01-100             | $4.60 \pm 0.80$     | $1.8 \pm 0.5$     | <b>2.6</b>                           | $10.3 \pm 3.1$    |
| HG DP7                    | 1000                    | 0.01-100             | $0.61 \pm 0.02$     | $10 \pm 1.4$      | <b>0.061</b>                         | -                 |
| HG DP7                    | 1000                    | 0.01-100             | $0.44 \pm 0.02$     | $8.6 \pm 2.0$     | <b>0.051</b>                         | -                 |

**Table S1. Results of Michaelis-Menten Kinetics assay experiments of the Arabidopsis heterologously-expressed GAUT1:GAUT7 complex.** Kinetic parameters and associated standard deviations ( $\pm$ ) were derived from nonlinear regression of assays containing at least 8 measurements. Representative Michaelis-Menten kinetics data are displayed in Fig. 2, D and E, as well as Fig. 4, B and C. Data displayed in the listed figures and in independent replicate experiments are reported in this table.
